# Supplementary material for: Mg doping of NiMn-LDH with a three-dimensional porous morphology for an efficient supercapacitor
Source: Royal Society of Chemistry journal article supplement (doi:10.1039/d3dt01154b), 2023-01-01
Supplement: d3dt01154b2.pdf [file d3dt01154b2.pdf]

## Supporting Information

### Mg doping NiMn-LDH with three-dimensional porous morphology for efficient supercapacitor

*Biao Zhang<sup>a</sup>, Ying Yang<sup>a</sup>, Jingliang Cai<sup>a</sup>, Xiaolong Hou<sup>a</sup>, Caini Yi<sup>a</sup>, Xuan Liao<sup>a</sup>, Yuping Liu<sup>a</sup>,  
Changguo Chen<sup>a</sup>, Danmei Yu,<sup>\*a</sup> and Xiaoyuan Zhou<sup>\*b</sup>*

<sup>a</sup> School of Chemistry and Chemical Engineering, Chongqing University, Chongqing, 401331, P.R. China

<sup>b</sup> College of Physics, Chongqing University, Chongqing, 401331, P.R. China

#### Corresponding Authors

\***Danmei Yu's** e-mail: yudanmei-1@163.com.

\***Xiaoyuan Zhou's** e-mail: xiaoyuan2013@cqu.edu.cn.

#### Notes

The authors declare no competing financial interest.

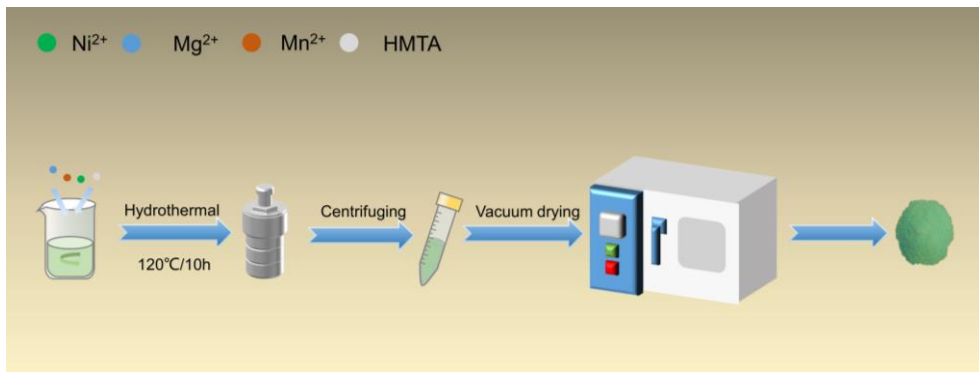

Figure S1. Schematic diagram of the synthesis of NiMnMg-LDH

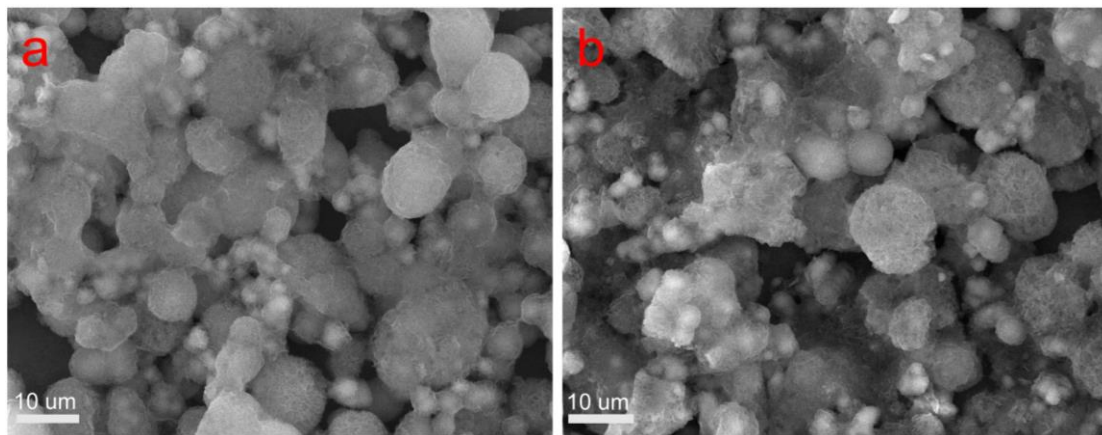

Figure S2. SEM images of NiMn-LDH (a), NiMnMg-LDH-7 (b)

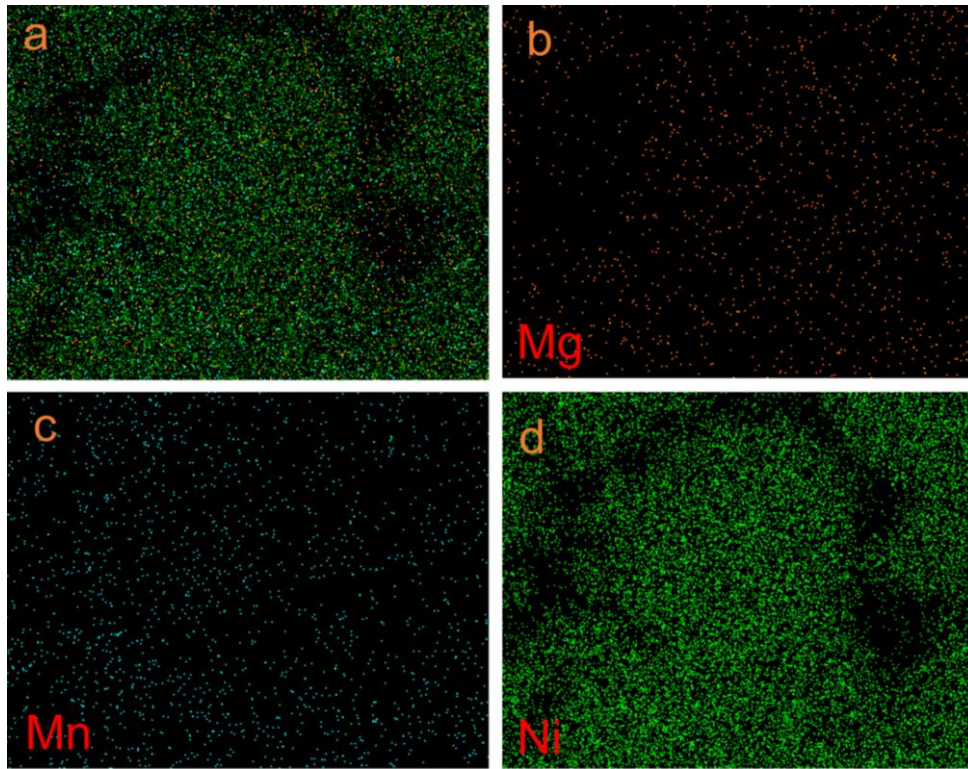

Figure S3. (a) EDS spectrum of NiMnMg-LDH-7, (b-d) corresponding EDS elemental maps

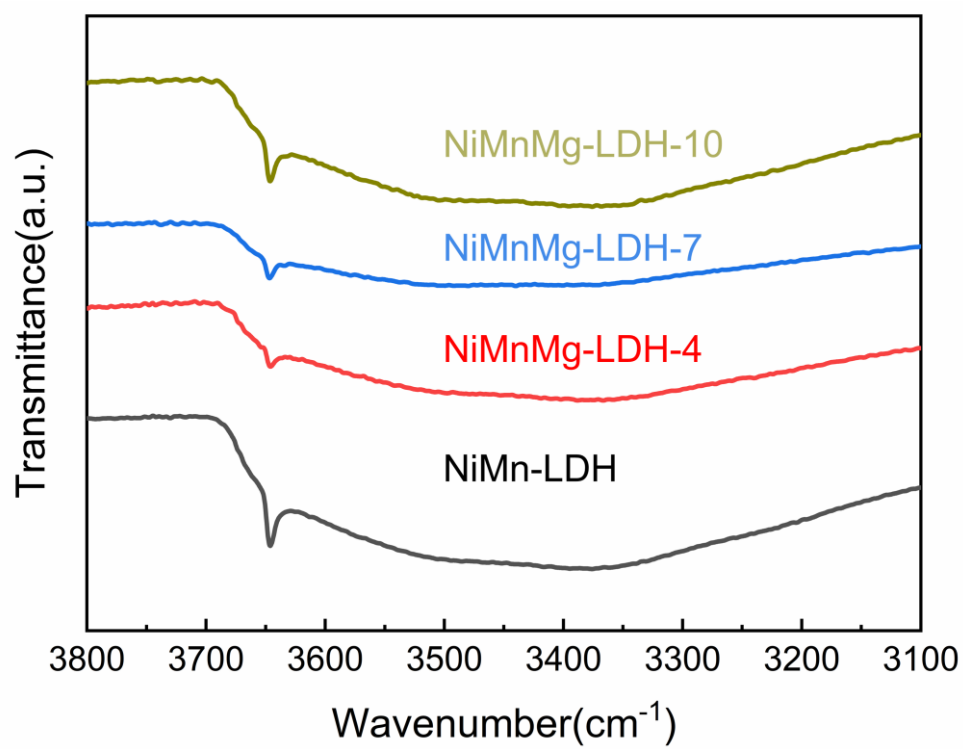

Figure S4. FTIR spectrum of the synthesized materials

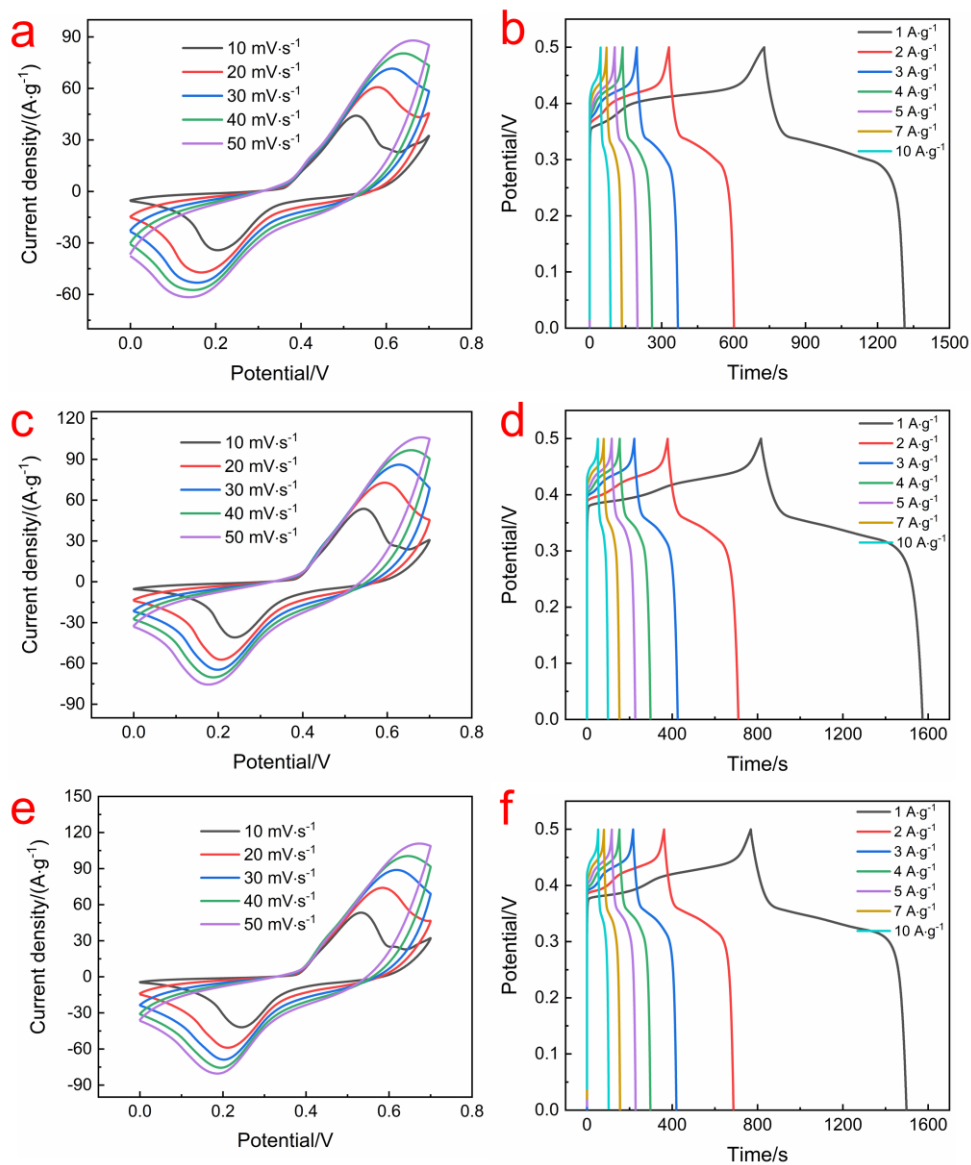

Figure S5. CV curves of NiMn-LDH (a), NiMnMg-LDH-4 (c) and NiMnMg-LDH-10 (e); GCD curves of NiMn-LDH (b), NiMnMg-LDH-4(d) and NiMnMg-LDH-10(f)

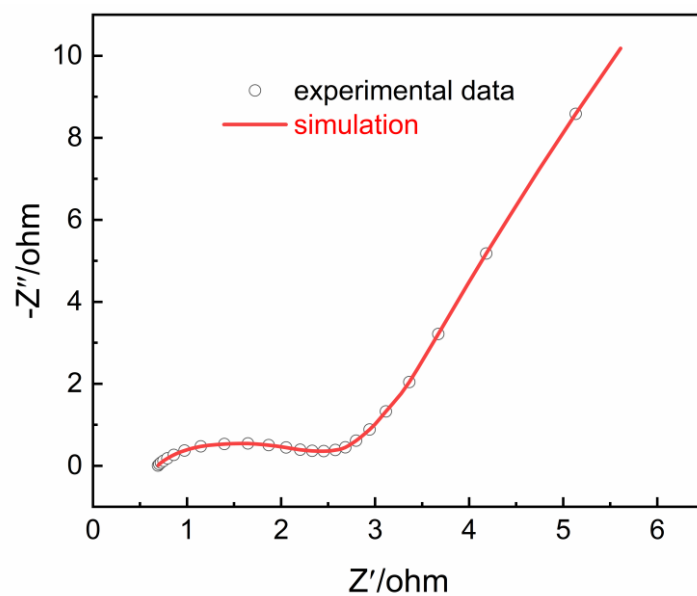

Figure S6. EIS fitting curve of NiMnMg-LDH-7

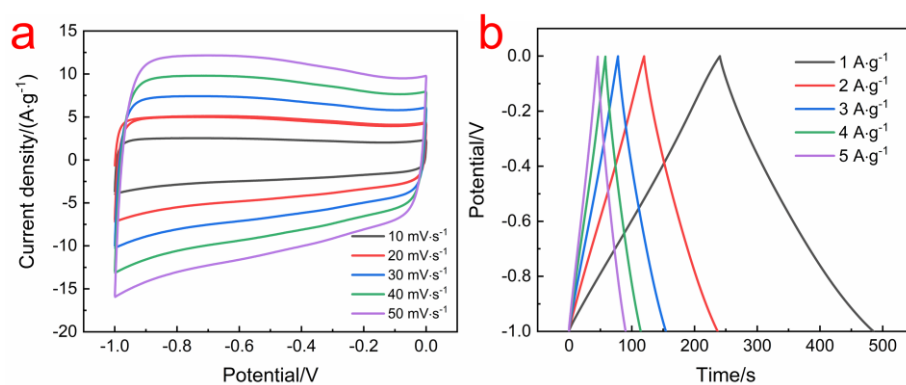

Figure S7. Electrochemical properties of negative activated carbon (AC): (a) CV curves; (b) GCD curves

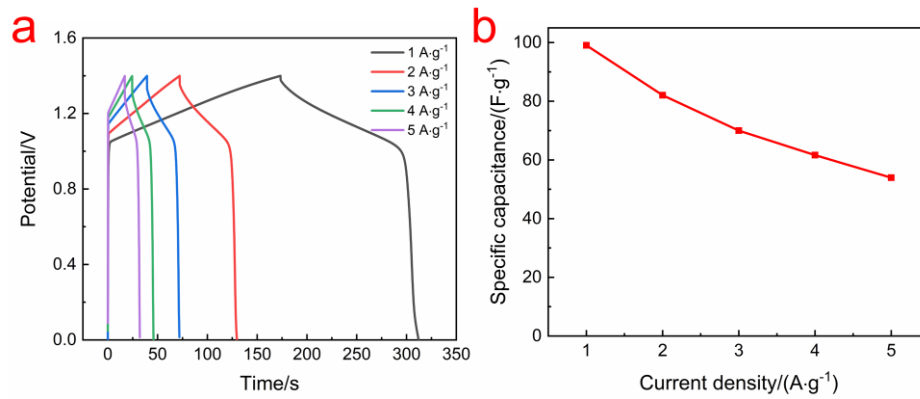

Figure S8. (a) GCD curves of ASC devices at different current densities; (b) the attenuation curve of specific capacity of ASC with the current densities

Table S1 Specific surface area of different materials

| Materials                                             | NiMn-LDH | NiMnMg-LDH-4 | NiMnMg-LDH-7 | NiMnMg-LDH-10 |
|-------------------------------------------------------|----------|--------------|--------------|---------------|
| Specific surface area/m <sup>2</sup> ·g <sup>-1</sup> | 51       | 73           | 87           | 68            |

Table S2 Fitted parameters based on the equivalent circuit by the ZView simulation

|               | R <sub>ct</sub> | R <sub>s</sub> |
|---------------|-----------------|----------------|
| NiMn-LDH      | 2.16            | 0.77           |
| NiMnMg-LDH-4  | 2.00            | 0.62           |
| NiMnMg-LDH-7  | 1.41            | 0.67           |
| NiMnMg-LDH-10 | 1.80            | 0.61           |
