# Supplementary figures and images for: Mg doping of NiMn-LDH with a three-dimensional porous morphology for an efficient supercapacitor
Source: Royal Society of Chemistry journal article supplement (doi:10.1039/d3dt01154b), 2023-01-01

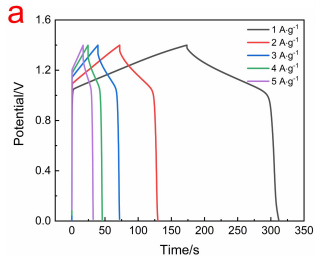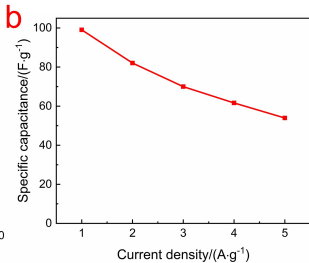

Supplement: d3dt01154b10.pdf [file d3dt01154b10.pdf]

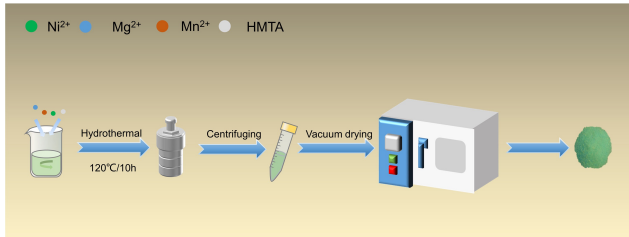

Supplement: d3dt01154b3.pdf [file d3dt01154b3.pdf]

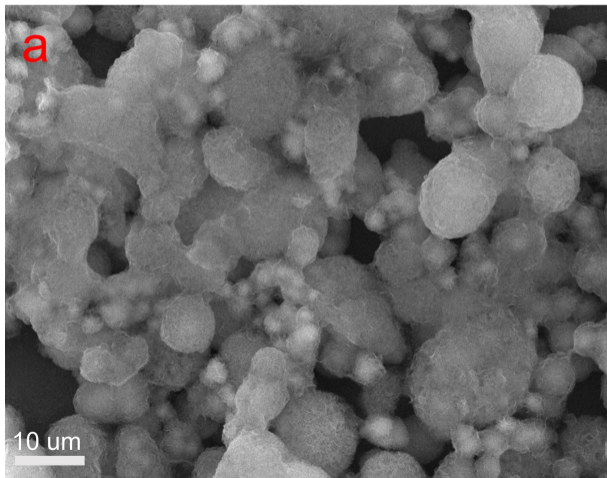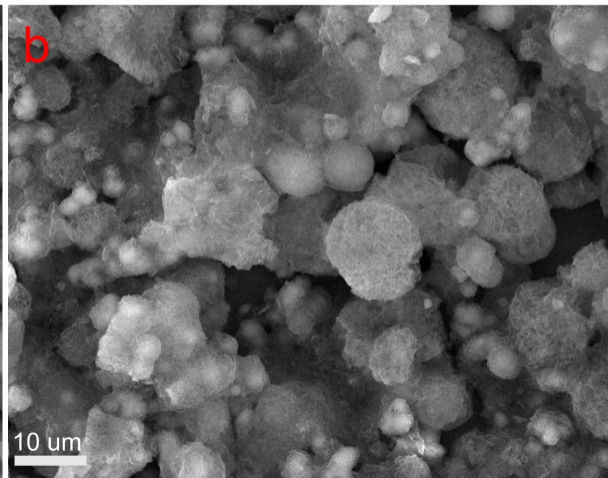

Supplement: d3dt01154b4.pdf [file d3dt01154b4.pdf]

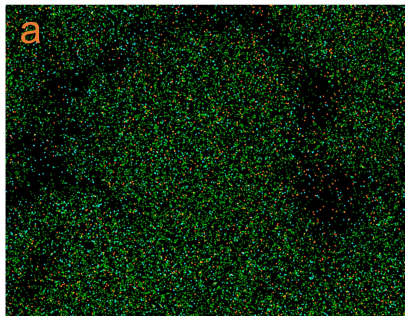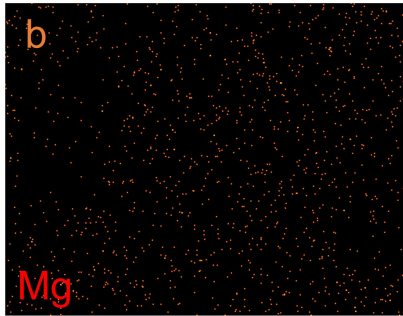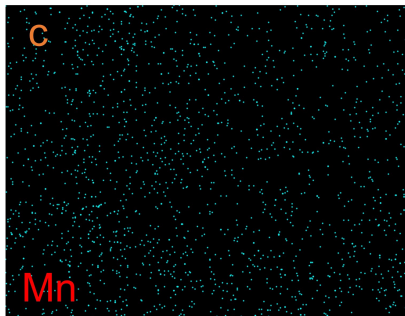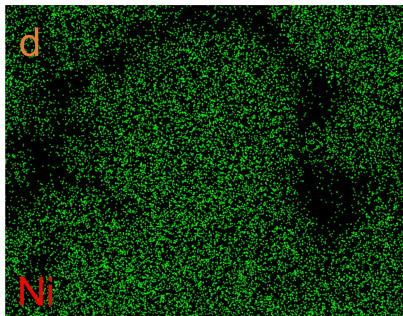

Supplement: d3dt01154b5.pdf [file d3dt01154b5.pdf]

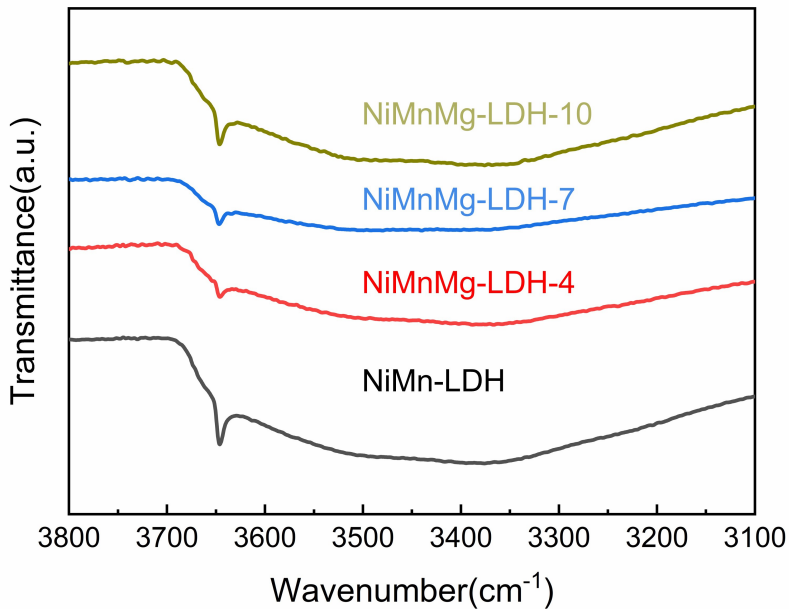

Supplement: d3dt01154b6.pdf [file d3dt01154b6.pdf]

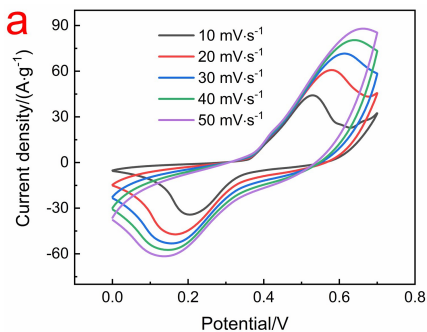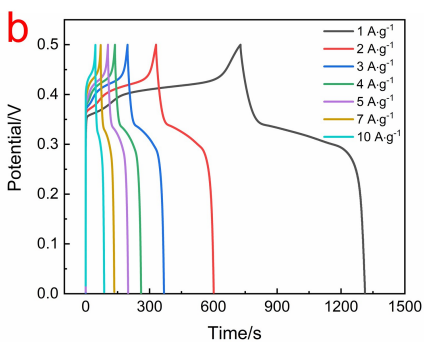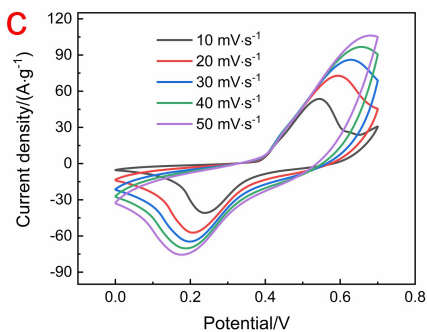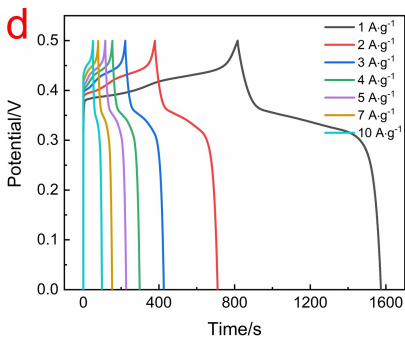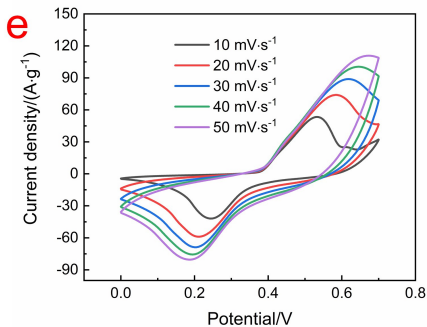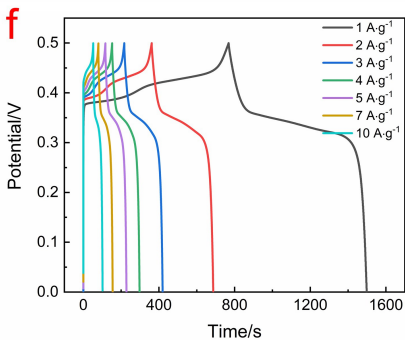

Supplement: d3dt01154b7.pdf [file d3dt01154b7.pdf]

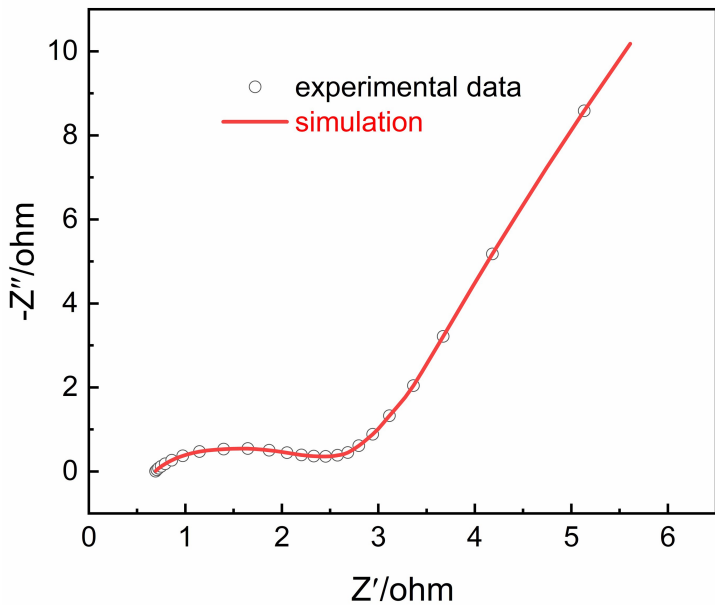

Supplement: d3dt01154b8.pdf [file d3dt01154b8.pdf]

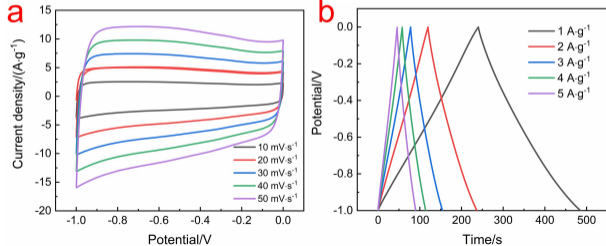

Supplement: d3dt01154b9.pdf [file d3dt01154b9.pdf]
